# Supplementary material
Source: PubMed Central journal article supplement (PMC2967383)
Supplement: NIHMS237381-supplement-supplement_1.pdf [file NIHMS237381-supplement-supplement_1.pdf]

## Supplemental Figure

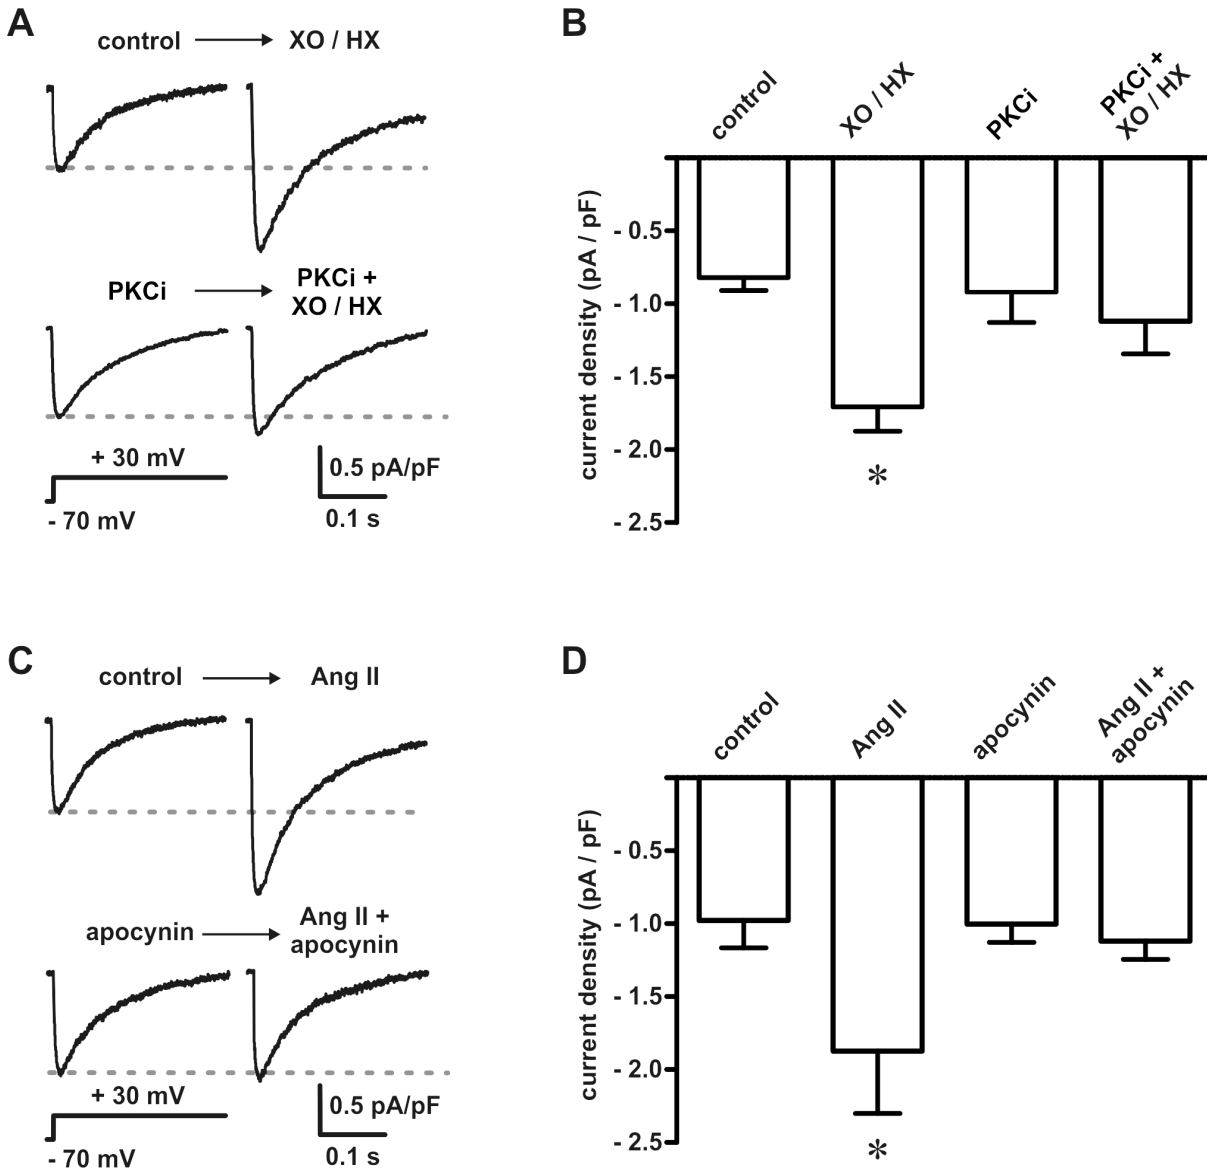

**Online Figure I. Reactive oxygen species increase PKC-dependent macroscopic L-type  $\text{Ca}^{2+}$  currents in isolated cerebral arterial smooth muscle cells.** A, Representative macroscopic L-type currents in response to a step depolarization to + 30 mV from a holding potential of - 70 mV before and after XO plus HX (2mU/mL and 250  $\mu\text{mol/L}$ , respectively) under control conditions (*top*) and in the presence of a PKC inhibitory peptide (PKCi; 100  $\mu\text{mol/L}$  in the patch pipette; *bottom*). B, Plot of the mean  $\pm$  SEM macroscopic L-type  $\text{Ca}^{2+}$  current densities (pA / pF) before and after XO/HX under control conditions and in the presence of PKCi ( $n = 6$  cells). C, Representative macroscopic L-type currents before and after Ang II (100 nmol/L) under control conditions (*top*) and in the presence of the NADPH oxidase inhibitor apocynin (25  $\mu\text{mol/L}$ ; *bottom*). D, Plot of the mean  $\pm$  SEM macroscopic L-type  $\text{Ca}^{2+}$  current densities (pA / pF) before and after Ang II under control conditions and in the presence of apocynin ( $n = 5$  cells). \*  $P < 0.05$
